# Supplementary material for: Camera-trapping estimates of the relative population density of Sympetrum dragonflies: application to multihabitat users in agricultural landscapes
Source: PeerJ. 2023 Feb 28;11:e14881. doi: 10.7717/peerj.14881 (PMC9983425; doi:10.7717/peerj.14881)
Supplement: Table S1 [file peerj-11-14881-s004.xlsx]

## Sheet: Table S1
	2018			2019			2020
(a)
	Installation date	Collection date		Installation date	Collection date		Installation date	Collection date
Sugaya	31th August	30th October		5th September	31th October		8th September	11th November
Imada	n.a	n.a		5th September	30th October		8th September	11th November
Sakata	29th August	29th October		4th September	30th October*		9th September	12th November
Harimichi	31th August	30th October		5th September	31th October		8th September	11th November
Kanaya	29th August	29th October		4th September	30th October		9th September	12th November
Mimigai	29th August	29th October		4th September	30th October		9th September	12th November
(b)	1st survey date	2nd survey date		1st survey date	2nd survey date		1st survey date	2nd survey date
Sugaya	12th September	3rd October		19th September	10th October		16th September	15th October
Imada	n.a	n.a		19th September	9th October		15th September	14th October
Sakata	13th September	6th October		21th September	9th October		15th September	14th October
Harimichi	12th September	3rd October		19th September	10th October		16th September	15th October
Kanaya	13th September	6th October		19th September	9th October		15th September	14th October
Mimigai	13th September	6th October		19th September	9th October		15th September	14th October
(c)	1st survey date	2nd survey date		1st survey date	2nd survey date		1st survey date	2nd survey date
Sugaya	28th June	5th July		5th July	12th July		9th July	16th July
Imada	25th June	3rd July		24th June	4th July		24th June	2nd July
Sakata	25th June	3rd July		24th June	4th July		24th June	2nd July
Harimichi	28th June	6th July		5th July	12th July		9th July	16th July
Kanaya	25th June	3rd July		24th June	4th July		24th June	2nd July
Mimigai	25th June	3rd July		24th June	4th July		24th June	2nd July
