# Supplementary material for: Camera-trapping estimates of the relative population density of Sympetrum dragonflies: application to multihabitat users in agricultural landscapes
Source: PeerJ. 2023 Feb 28;11:e14881. doi: 10.7717/peerj.14881 (PMC9983425; doi:10.7717/peerj.14881)
Supplement: Table S2 — The mean and standard deviation (SD) values derived from three camera traps (n = 3) for each year for each plot were shown. [file peerj-11-14881-s005.xlsx]

## Sheet: Table S2
		Number of pictures automatically captured	Number of pictures automatically captured any darter (Sympetrum spp.) dragonfly	Corrected*1 number of pictures automatically captured any darter (Sympetrum spp.) dragonfly	Corrected number of pictures automatically captured Sympetrum infuscatum	Corrected number of pictures automatically captured the other darter dragonfly	Occasion*2
(a) 2018
Sugaya	mean	2044	287	215.667	0	215.667	44.3333
	SD	1636.94	252.721	191.792	0	191.792	15.0111
Imada	mean	n.a	n.a	n.a	n.a	n.a	n.a
	SD
Sakata	mean	1072.33	74.3333	63.6667	0	63.6667	46
	SD	1098.4	107.825	91.0842	0	91.0842	17.3494
Harimichi	mean	1356	675.333	548.333	507.667	40.6667	23.3333
	SD	494.513	597.52	508.921	470.194	39.1067	16.8028
Kanaya	mean	2276.67	50.3333	49.3333	0.333333	49	39.6667
	SD	1747.98	49.5412	49.642	0.57735	49.1223	11.2398
Mimigai	mean	2547.33	307	280	0.666667	279.333	49.3333
	SD	1090.92	351.13	308.219	1.1547	308.562	6.02771
(b) 2019
Sugaya	mean	6508.67	1903.67	1449.33	581.667	867.667	36.3333
	SD	7888.08	1173.21	912.218	716.691	203.78	9.45163
Imada	mean	1617.33	513.333	371.667	353.333	18.3333	51
	SD	2167.8	494.304	335.645	323.63	16.2583	6.9282
Sakata	mean	1086.33	523.333	389.667	77	312.667	40.6667
	SD	798.569	576.32	426.922	66.7757	378.874	9.29157
Harimichi	mean	1625.67	1332.67	1064.33	971.667	92.6667	36.6667
	SD	1357.36	1254.14	1042.27	1037.9	128.072	6.02771
Kanaya	mean	1162.67	350.667	260.667	69	191.667	36.6667
	SD	881.999	375	272.298	115.191	175.012	17.8979
Mimigai	mean	3252.67	644.667	524.333	106.667	417.667	39
	SD	4037.22	570.791	450.45	88.6698	363.448	3
(c) 2020
Sugaya	mean	1663	1170	906	50.3333	855.667	43.3333
	SD	1061.26	1015.41	804.415	49.521	755.689	7.57188
Imada	mean	1800.33	787.667	581.667	531.333	50.3333	46.6667
	SD	905.003	813.802	629.768	597.085	35.0761	10.0167
Sakata	mean	629.333	34.6667	26.6667	2	24.6667	46
	SD	429.365	19.7315	14.4338	3.4641	17.8979	1
Harimichi	mean	1087.67	899.667	704	665	39	49.6667
	SD	1272.07	1114.82	900.784	837.284	64.1171	8.7369
Kanaya	mean	608.333	203	153.333	12	141.333	44.3333
	SD	697.683	351.606	265.581	20.7846	244.797	3.51188
Mimigai	mean	662	148.667	106	2	104	54
	SD	469.438	151.579	107.531	3.4641	104.504	5
