# Supplementary material for: Camera-trapping estimates of the relative population density of Sympetrum dragonflies: application to multihabitat users in agricultural landscapes
Source: PeerJ. 2023 Feb 28;11:e14881. doi: 10.7717/peerj.14881 (PMC9983425; doi:10.7717/peerj.14881)
Supplement: Table S3 — The values of two times of surveys per year were averaged. [file peerj-11-14881-s006.xlsx]

## Sheet: Table S3
	2018				2019				2020
	S. infuscatum	Other darter dragonflies	(S. frequens)		S. infuscatum	Other darter dragonflies	(S. frequens)		S. infuscatum	Other darter dragonflies	(S. frequens)
Sugaya	0	0.5625	0.5625		0.0625	4.0625	3.9375		0.03125	2.125	2.09375
Imada	n.a	n.a	n.a		0.0625	1.5	1.25		0.125	0.5	0.375
Sakata	0.0416667	0.5	0.416667		0.0833333	1.625	1.25		0	0.791667	0.625
Harimichi	1.20833	1.29167	1.04167		2.375	1.58333	0.416667		0.666667	1.04167	0.291667
Kanaya	0	0.416667	0.375		0	1.54167	1.54167		0	0.916667	0.75
Mimigai	0.0625	0.9375	0.9375		0	2.5625	2.5625		0	1.125	1.0625
