# Supplementary material for: Camera-trapping estimates of the relative population density of Sympetrum dragonflies: application to multihabitat users in agricultural landscapes
Source: PeerJ. 2023 Feb 28;11:e14881. doi: 10.7717/peerj.14881 (PMC9983425; doi:10.7717/peerj.14881)
Supplement: Table S4 — The values of two times of surveys per year were averaged. [file peerj-11-14881-s007.xlsx]

## Sheet: Table S4
	2018				2019				2020
	S. infuscatum	Other darter dragonflies	(S. frequens)		S. infuscatum	Other darter dragonflies	(S. frequens)		S. infuscatum	Other darter dragonflies	(S. frequens)
Sugaya	0	0.25	0.25		0	0.375	0.375		0	0.3125	0.3125
Imada	0.0625*	0.6875*	0.6875*		0.125	1.4375	1.4375		0.25	2.875	2.6875
Sakata	0	0.833333	0.791667		0	0.25	0.25		0	0.125	0.125
Harimichi	0.0416667	0	0		0.0625	0.25	0.1875		0.916667	0.833333	0.75
Kanaya	0	0.416667	0.375		0	4.08333	4.08333		0	1.75	1.75
Mimigai	0	59	59		0	17.625	17.375		0	30.875	30.875
