# Supplementary material for: Camera-trapping estimates of the relative population density of Sympetrum dragonflies: application to multihabitat users in agricultural landscapes
Source: PeerJ. 2023 Feb 28;11:e14881. doi: 10.7717/peerj.14881 (PMC9983425; doi:10.7717/peerj.14881)
Supplement: Table S5 — (A) the other darter dragonflies without log-transformation of the explanatory variable, (B) the total darter dragonflies. The results of GLMM incorporating individual differences among sensors as a random effect for (C) Sympetrum infuscatum, (D) the Other darter dragonflies, (E) the total darter dragonflies, respectively, were also shown (see also Code S1). [file peerj-11-14881-s008.xlsx]

## Sheet: Table S5
	Estimated value	Standard Error	Z value	P value (Z)
(a)
Intercept	0.2465	0.4606	0.535	0.59254
Mean density index of the other Sympetrum dragonflies	0.8565	0.2897	2.957	0.00311
(b)*
Intercept	1.2287	0.3148	3.903	9.52e-05
Mean density index of the total Sympetrum dragonflies (log transformed + 0.5)	1.5381	0.4028	3.819	0.000134
(c)
Intercept	2.412	1.448	1.665	0.095844
Mean density index of Sympetrum infuscatum (log transformed +0.5)	5.108	1.393	3.666	0.000246
(d)
Intercept	0.5076	0.3788	1.34	0.18031
Mean density index of the other Sympetrum dragonflies (log transformed + 0.5)	1.6826	0.5662	2.972	0.00296
(e)*
Intercept	1.2293	0.3349	3.671	0.000242
Mean density index of the total Sympetrum dragonflies (log transformed + 0.5)	1.5376	0.4131	3.722	0.000198
*The values of coefficients, standard errors, and variance of random effects were estimated, but deviance was not calculated due to model convergence problem
