# Supplementary material for: Camera-trapping estimates of the relative population density of Sympetrum dragonflies: application to multihabitat users in agricultural landscapes
Source: PeerJ. 2023 Feb 28;11:e14881. doi: 10.7717/peerj.14881 (PMC9983425; doi:10.7717/peerj.14881)
Supplement: Table S6 — See also Code S1. [file peerj-11-14881-s009.xlsx]

## Sheet: Table S6
	Estimated value	Standard Error	Z value	P value (Z)
(a)
Intercept	2.39063	0.422422	5.659	1.52e-08
Mean density index of exuviae of total Sympetrum dragonflies	-0.009458	0.020473	-0.462	0.644
