# Supplementary material for: Camera-trapping estimates of the relative population density of Sympetrum dragonflies: application to multihabitat users in agricultural landscapes
Source: PeerJ. 2023 Feb 28;11:e14881. doi: 10.7717/peerj.14881 (PMC9983425; doi:10.7717/peerj.14881)
Supplement: Table S7 — Please note that uncertainty of coefficients was not estimated due to a lack of information. [file peerj-11-14881-s010.xlsx]

## Sheet: Table S7
	Estimated value	Standard Error	Z value	P value (Z)
(a)
Intercept	1.00357	n.a	n.a	n.a
Mean detection frequency per occasion of total Sympetrum dragonfly in the previous year	-0.004372	n.a	n.a	n.a
