# Supplementary material for: Camera-trapping estimates of the relative population density of Sympetrum dragonflies: application to multihabitat users in agricultural landscapes
Source: PeerJ. 2023 Feb 28;11:e14881. doi: 10.7717/peerj.14881 (PMC9983425; doi:10.7717/peerj.14881)
Supplement: Table S8 — (A) Estimated effects of mean adult-density index of S. frequens by line-transect survey on camera-detection frequency of the other darters (corresponding to the Table 1b in the main document), (B) Estimated effects of mean exuviae-density index of S. frequens by line-transects in early summer on camera-detection frequency of other darters in autumn of the same year (corresponding to the Table 2b in the main document), (C) Etimated effects of mean camera-detection frequency of adult individuals of other darters in autumn of the previous year on mean exuviae-density index of S. frequens in early summer (corresponding to the Table 3b in the main document). [file peerj-11-14881-s011.xlsx]

## Sheet: Table S8
(a)*
effects on camera-detection frequency of the other darter dragonflies	Estimated value	Standard Error	Z value	P value (Z)
Intercept	0.6984	0.2988	2.338	0.019404
Mean adult-density index of S. frequens (log-transformed + 0.5)	1.7434	0.4917	3.546	0.000391
(b)
effects on camera detection frequency of the other darter dragonflies	Estimated value	Standard Error	Z value	P value (Z)
Intercept	1.36147	0.487369	2.793	0.00521
Mean exuviae-density index of the S. frequens	0.008158	0.023395	0.349	0.72731
(c)
effects on exuviae-density index of S. frequens	Estimated value	Standard Error	Z value	P value (Z)
Intercept	0.88221	0.67491	1.307	0.191
Mean camera-detection frequency per occasion of the other darter dragonflies in the previous year	-0.02144	0.02569	-0.835	0.404
*The values of coefficients, standard errors, and variance of random effects were estimated, but deviance was not calculated due to model convergence problem
